# Supplementary material for: Solvent-free synthesis of titanosilicate zeolites
Source: Royal Society of Chemistry journal article supplement (doi:10.1039/c5ta02680f), 2015-01-01
Supplement: c5ta02680f1.pdf [file c5ta02680f1.pdf]

## Electronic Supplementary Information

### Solvent-Free Synthesis of Titanosilicate Zeolites

Longfeng Zhu,<sup>b</sup> Jian Zhang,<sup>a</sup> Liang Wang,<sup>\*a</sup> Qinming Wu,<sup>a</sup> Chaoqun Bian,<sup>a</sup> Shuxiang Pan,<sup>a</sup> Xiangju Meng,<sup>a</sup> Feng-Shou Xiao<sup>\*a</sup>

<sup>a</sup> Key Laboratory of Applied Chemistry of Zhejiang Province, Zhejiang University, Hangzhou 310028, China

<sup>b</sup> School of Biology and Chemical Engineering, Jiaying University, Jiaying 314001, China

\* Corresponding author. E-mail: liangwang@zju.edu.cn; fsxiao@zju.edu.cn

## Experimental Section

### Materials

All reagents were used without purification. Tetra-*n*-butyl titanate (TBOT), tetraethyl orthosilicate (TEOS), titanium sulfate, and isopropyl alcohol (IPA) were obtained from Shanghai Chemical Reagent Company. Fumed silica ( $\text{SiO}_2 > 99$  wt.%) was supplied from Shenyang Chemical Reagent Co., Ltd. Tetrapropylammonium hydroxide (TPAOH, *ca.* 40 wt.%) and tetraethyl ammonium hydroxide (TEAOH, *ca.* 35 wt.%) were supplied by BASF Company. Ammonium fluoride ( $\text{NH}_4\text{F}$ ), hydrogen fluoride (HF, *ca.* 40 wt.%), and hydrogen peroxide ( $\text{H}_2\text{O}_2$ , *ca.* 30 wt.%) were obtained from the Aladdin Chemical Reagent Company. Hexane, 2-hexanol, 3-hexanol, 2-hexanone, 3-hexanone, and MeOH were also obtained from the Aladdin Chemical Reagent Company.

## Synthesis

### *Solvent-free synthesis of S-TS-1 samples.*

The S-TS-1 samples were synthesized from starting titanosilicate mixtures with molar ratios of  $\text{SiO}_2/0.01\text{-}0.02\text{Ti}(\text{SO}_4)_2/0.1\text{-}0.15\text{TPAOH}/1.7\text{-}2.5\text{H}_2\text{O}$ . As a typical run, 0.60 g of fumed silica was mixed with 0.508 g of TPAOH (40 wt.%). After grinding for 5 min, the solid mixture can be obtained, followed by addition of 0.024 g titanium sulfate and 0.015 g silicalite-1 seeds. After grinding for 10-20 min, the mixture was transformed to an autoclave, heating at 180 °C for 24-48 h. The product was collected by filtrating and washing with deionized water at room temperature and drying at 80 °C for 24 h. The products obtained were designated as S-TS-1- $x$ , where  $x$  stands for  $\text{SiO}_2/\text{TiO}_2$  ratios in the solid mixture.

### *Hydrothermal synthesis of C-TS-1 samples.*

The C-TS-1 samples were hydrothermally synthesized from the starting titanosilicate gels with molar ratios of  $\text{SiO}_2/0.01\text{-}0.02\text{TBOT}/0.3\text{TPAOH}/40\text{H}_2\text{O}/0.33\text{IPA}$ . As a typical run for the synthesis of C-TS-1, (1) 0.154 g of TBOT was dissolved in 0.448 g of IPA, followed by the addition of 3.23 mL of TPAOH (40 wt.%) and 7.03 mL of water; (2) After stirring at room temperature for 1.5 h, 6 mL of water was added and stirred for another 15 min; (3) After adding 5 mL of TEOS into the gel and stirring for overnight, the gel was transferred into an autoclave to crystallize at 180 °C for 3 days. The product was collected by centrifuging and washing with deionized water at room temperature and drying at 80 °C for 24 h. The products obtained were designated as C-TS-1- $x$ , where  $x$  stands for  $\text{SiO}_2/\text{TiO}_2$  ratios in the gels.

### *Solvent-free synthesis of S-Ti-Beta sample.*

The S-Ti-Beta samples were synthesized from the starting titanosilicate mixtures with molar ratios of  $\text{SiO}_2/0.01\text{-}0.02\text{Ti}(\text{SO}_4)_2/0.15\text{-}0.20\text{TEAOH}/0.15\text{-}0.20\text{NH}_4\text{F}/2.3\text{-}3.0\text{H}_2\text{O}$ . As a typical run, 0.60 g of fumed silica was mixed with 0.632 g of TEAOH (35 wt.%).

After grinding for 5 min, the solid mixture can be obtained, followed by addition of 0.024 g titanium sulfate, 0.055 g  $\text{NH}_4\text{F}$ , and 0.03 g all silica Beta seeds. After grinding for 10-20 min, the mixture was transformed to an autoclave, heating at 140 °C for 12-14 days. The product was collected by filtrating and washing with deionized water at room temperature and drying at 80 °C for 24 h. The products obtained were designated as S-Ti-Beta- $x$ , where  $x$  stands for  $\text{SiO}_2/\text{TiO}_2$  ratios in the solid mixture.

#### *Hydrothermal synthesis of C-Ti-Beta sample.*

The C-Ti-Beta samples were hydrothermally synthesized from the starting titanosilicate gels with molar ratios of  $\text{SiO}_2/0.01\text{-}0.02\text{TBOT}/0.5\text{TEAOH}/0.5\text{HF}/3.0\text{-}6.0\text{H}_2\text{O}$ . As a typical run, (1) 0.068 g of TBOT was dissolved in 2 g of  $\text{H}_2\text{O}_2$ ; (2) 4.46 mL of TEOS and 4.2 mL of TEAOH (35 wt.%) were mixed, followed by the addition of titanium solution; (3) After stirring at room temperature for 12 h, 0.44 mL of HF was added. (4) At last, 0.06 g all silica Beta seeds were added. After the evaporation of the calculated amount of  $\text{H}_2\text{O}$ , the gel was transformed into a 30 mL autoclaves to crystallize at 140 °C for 10 days. The product was collected by filtrating and washing with deionized water at room temperature and drying at 80 °C for 24 h. The products obtained were designated as C-Ti-Beta- $x$ , where  $x$  stands for  $\text{SiO}_2/\text{TiO}_2$  ratios in the gels.

## **Characterization**

X-ray powder diffraction (XRD) patterns were measured with a Rigaku Ultimate VI X-ray diffractometer (40 kV, 40 mA) using  $\text{CuK}\alpha$  ( $\lambda=1.5406 \text{ \AA}$ ) radiation. The  $\text{N}_2$  sorption isotherms at the temperature of liquid nitrogen were measured using Micromeritics ASAP 2020M. UV-Vis spectra were measured on a PERKIN ELMER Lambda 20 spectrophotometer. The sample composition was determined by inductively coupled plasma-atomic emission spectrometry (ICP-AES) with a Perkin-Elmer 8000 OES. Scanning electron microscopy (SEM) experiments were performed

on Hitachi SU-1510 electron microscopes. Transmission electron microscopy (TEM) images were performed on a JEM-2100F electron microscopy (JEOL, Japan) with an acceleration voltage of 200 kV.  $^{29}\text{Si}$  MAS NMR spectra were recorded on a Bruker AVANCEIII 500WB spectrometer.

### **Catalytic tests**

The oxidation of hexane with  $\text{H}_2\text{O}_2$  was performed in a 40 mL autoclave with a magnetic stirrer (900 rpm). Typically, organic substrate, solvent, and catalyst were mixed in the reactor. After increasing to the reaction temperature (the temperature was measured with a thermometer in an oil bath),  $\text{H}_2\text{O}_2$  solution (30 wt.%) was introduced. After reaction, the products were analyzed by gas chromatography (GC-14C, Shimadzu, FID) with a flexible quartz capillary column (FFAP and OV-17).

**Table S1.** Si/Ti ratios and textural parameters of S-TS-1, C-TS-1, S-Ti-Beta, and C-Ti-Beta samples.

| Sample        | Si/Ti <sup>a</sup> | BET surface<br>area (m <sup>2</sup> /g) | Micropore<br>area<br>(m <sup>2</sup> /g) | Total pore<br>volume<br>(cm <sup>3</sup> /g) | Micropore<br>volume<br>(cm <sup>3</sup> /g) |
|---------------|--------------------|-----------------------------------------|------------------------------------------|----------------------------------------------|---------------------------------------------|
| S-TS-1-100    | 92                 | 444                                     | 428                                      | 0.25                                         | 0.20                                        |
| S-TS-1-50     | 47                 | 460                                     | 418                                      | 0.30                                         | 0.20                                        |
| C-TS-1-100    | 82                 | 475                                     | 451                                      | 0.36                                         | 0.21                                        |
| C-TS-1-50     | 43                 | 450                                     | 427                                      | 0.32                                         | 0.20                                        |
| S-Ti-Beta-100 | 146                | 477                                     | 461                                      | 0.24                                         | 0.22                                        |
| C-Ti-Beta-100 | 141                | 509                                     | 489                                      | 0.26                                         | 0.23                                        |

<sup>a</sup> Si/Ti ratios obtained from ICP-AES.

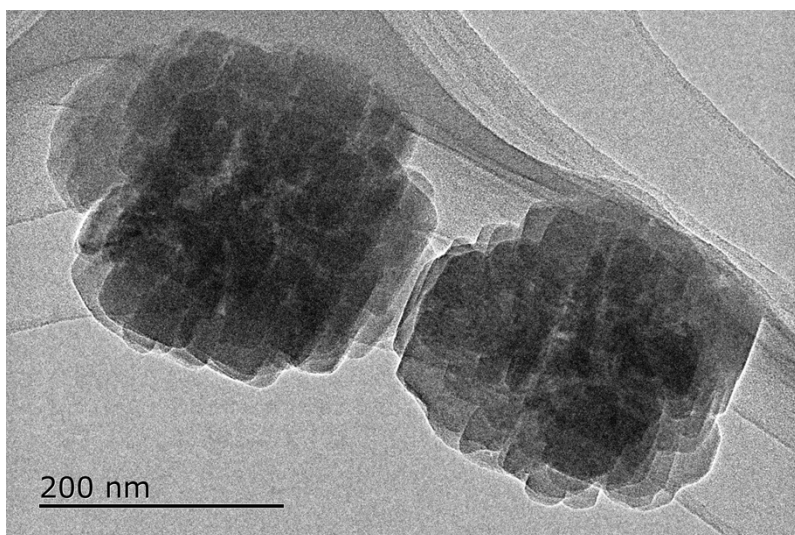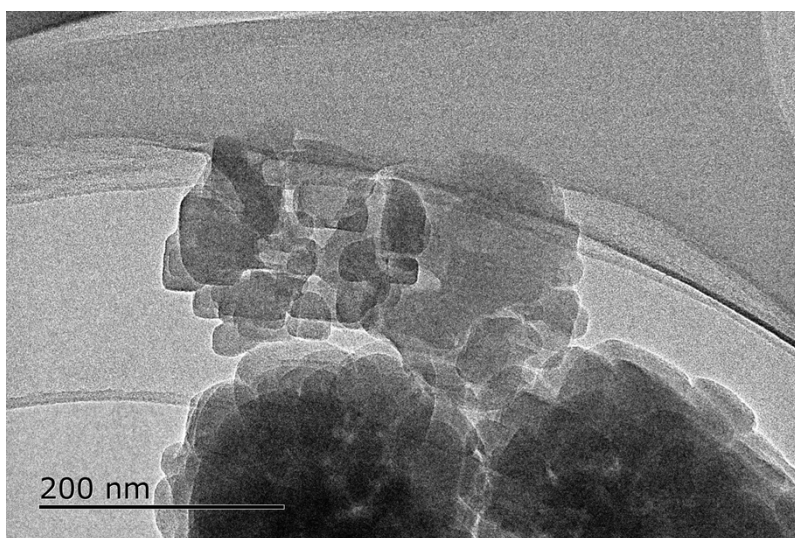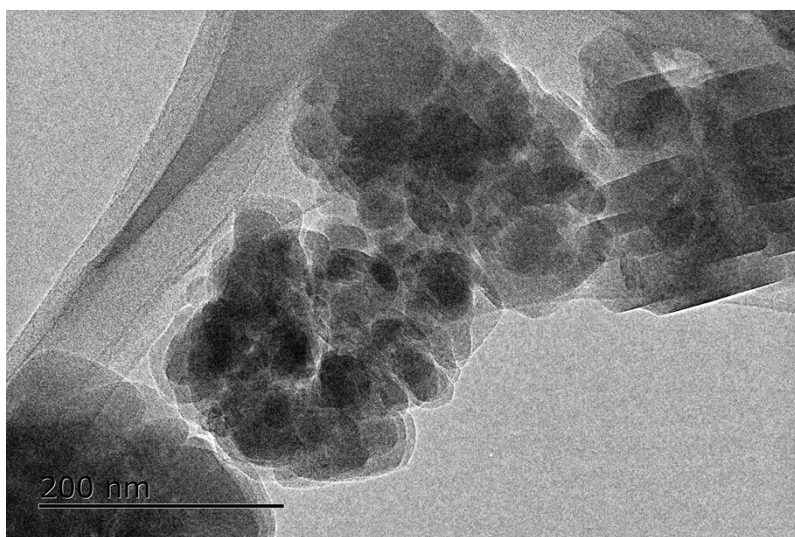

**Figure S1.** More high magnification TEM images of the solvent-free synthesis of TS-1. It is easy to observe that the zeolite particles are composed of smaller crystals.

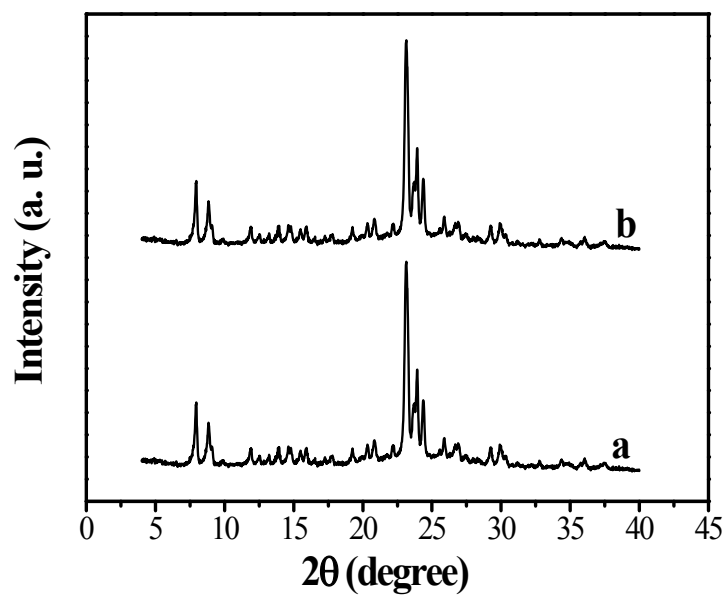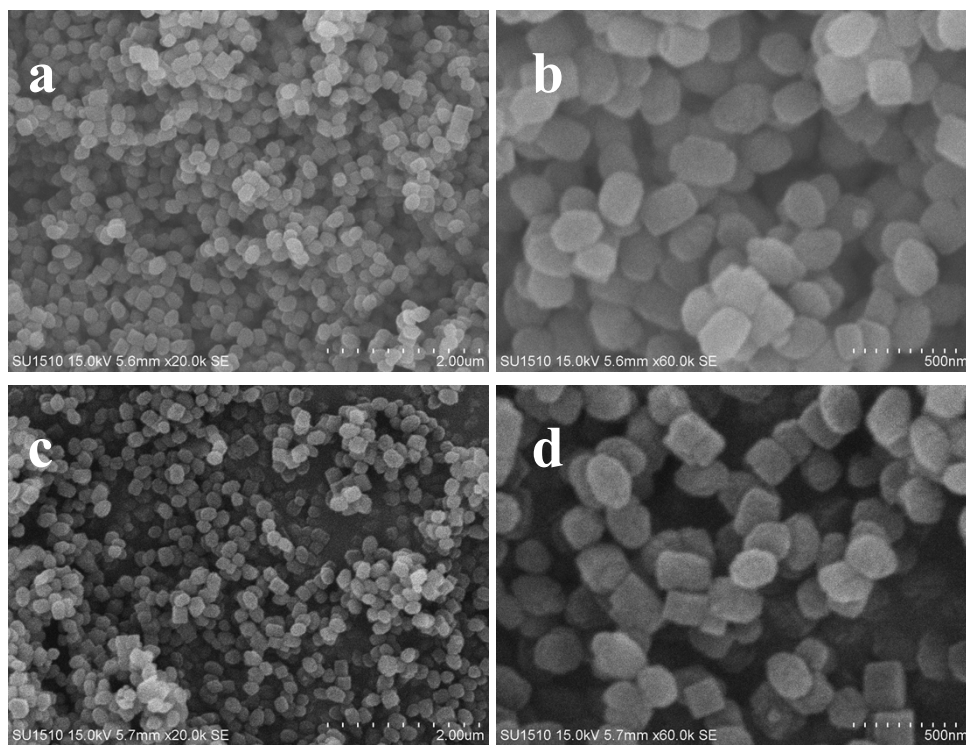

**Figure S2.** (Top) XRD patterns of (a) C-TS-1-100 and (b) C-TS-1-50; (Bottom) Low and high magnification SEM images of C-TS-1-100 (a, b) and C-TS-1-50 (c, d).

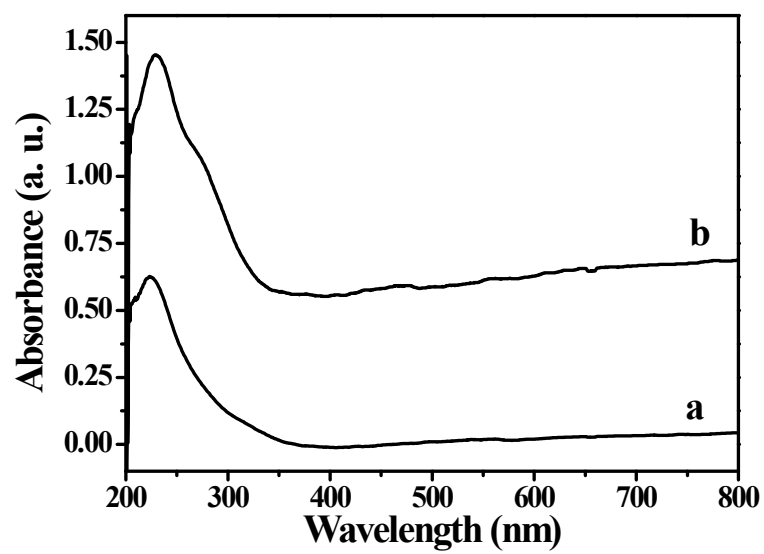

**Figure S3.** UV-visible spectra of (a) C-TS-1-100 and (b) C-TS-1-50.



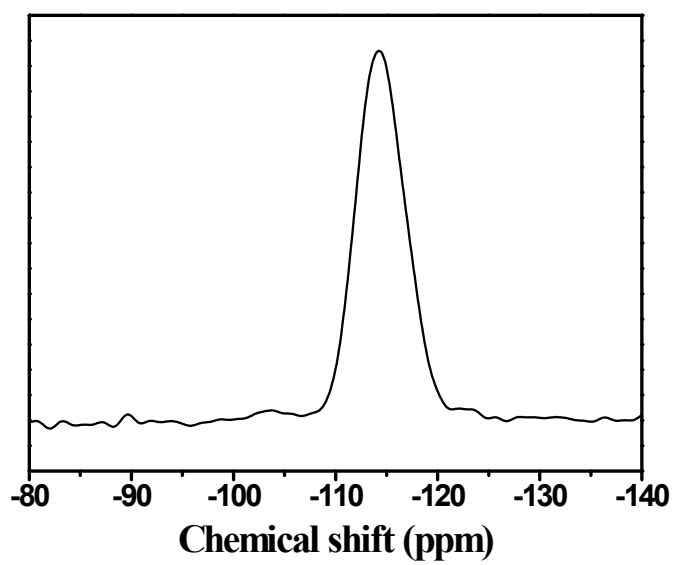

**Figure S4.**  $^{29}\text{Si}$  MAS NMR spectrum of C-TS-1-100.

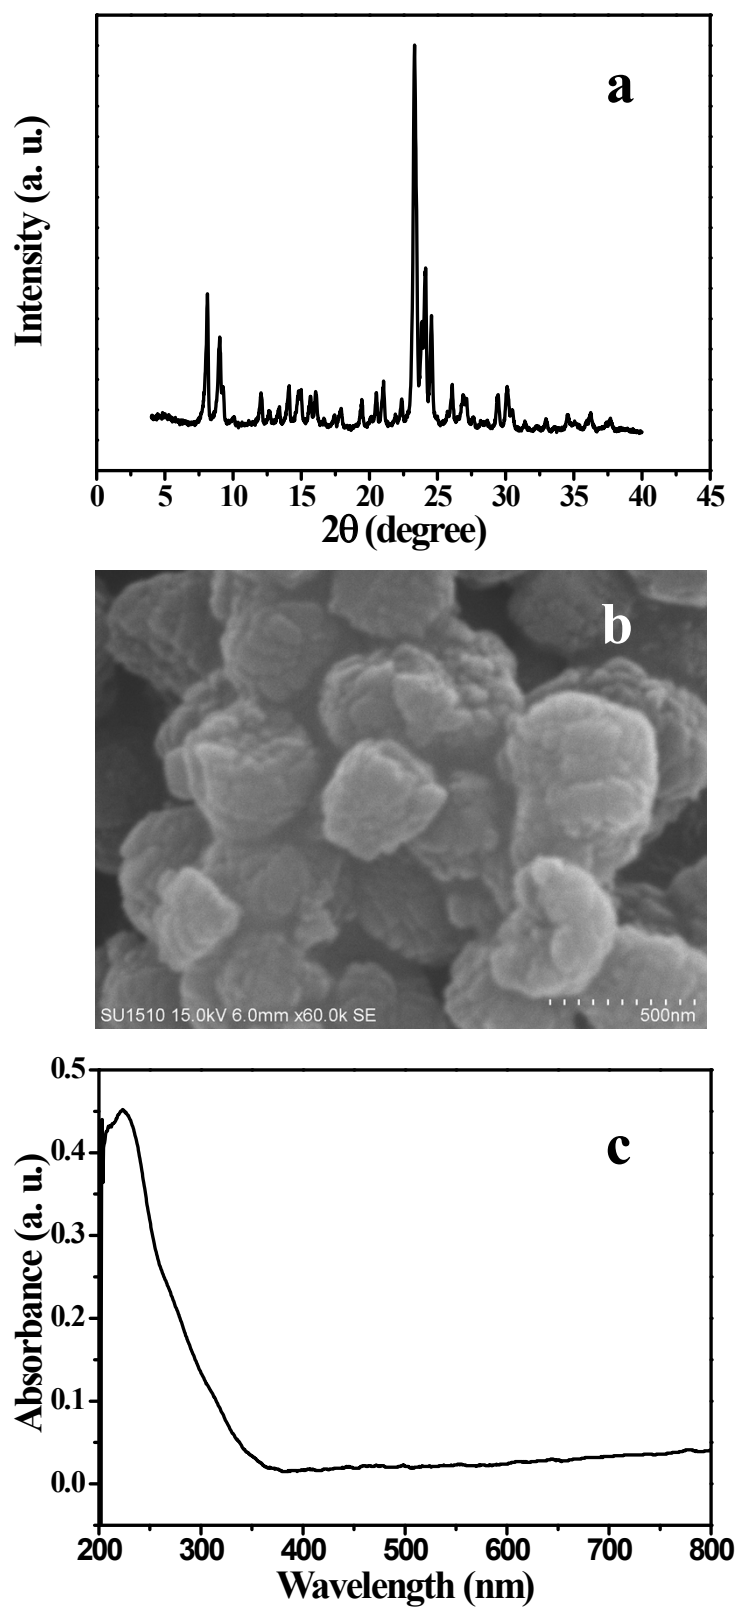

**Figure S5.** (a) XRD pattern, (b) SEM image, and (c) UV-visible spectrum of S-TS-1-50.

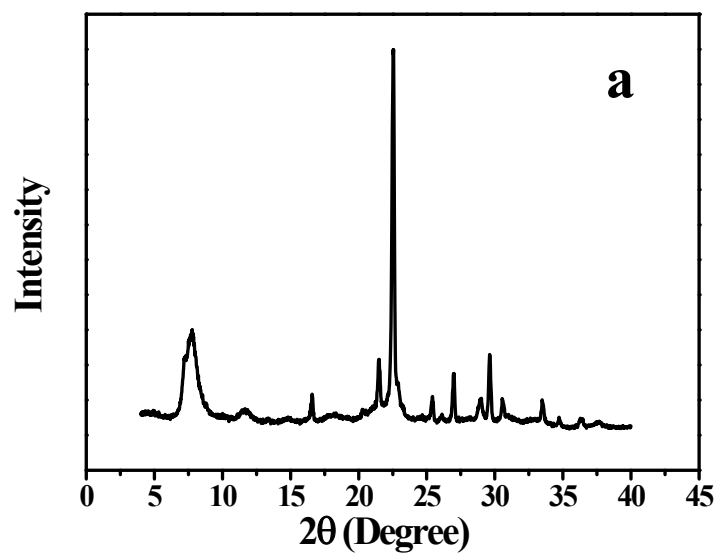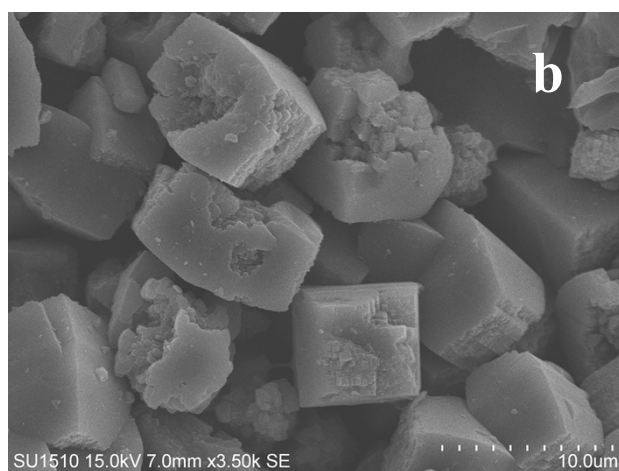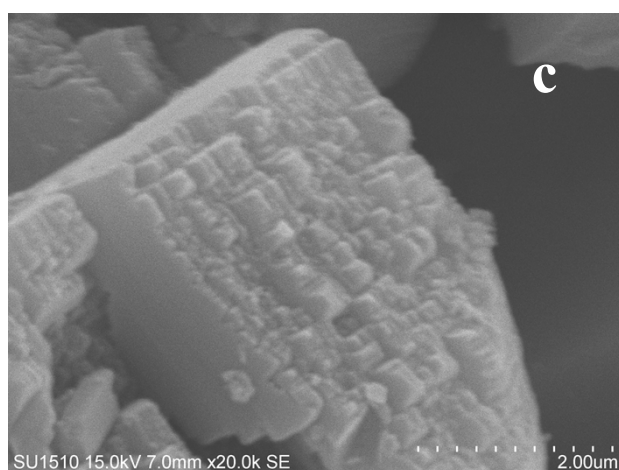

**Figure S6.** (a) XRD pattern, (b) low and (c) high magnification SEM images of S-Ti-Beta-100.

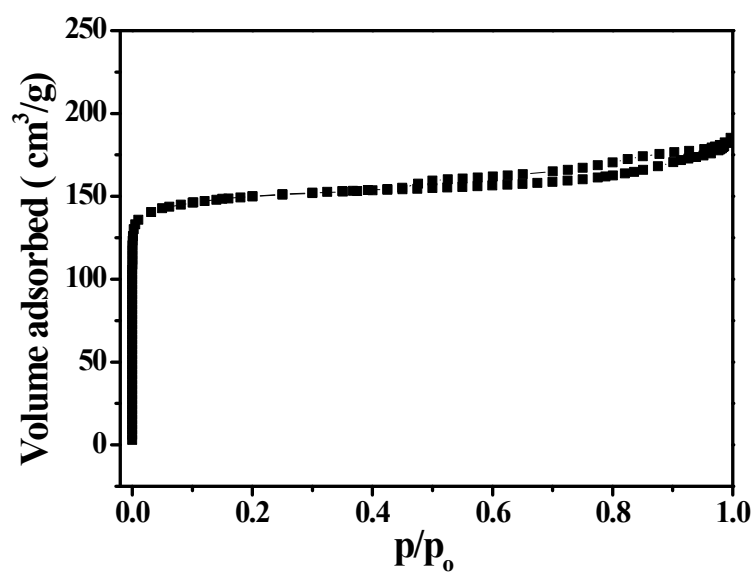

**Figure S7.** N<sub>2</sub> sorption isotherms of S-Ti-Beta-100.

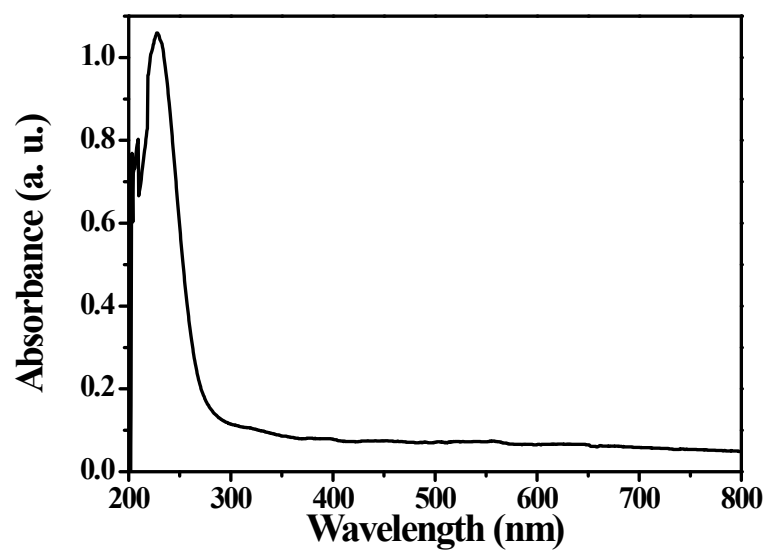

**Figure S8.** UV-visible spectrum of S-Ti-Beta-100.

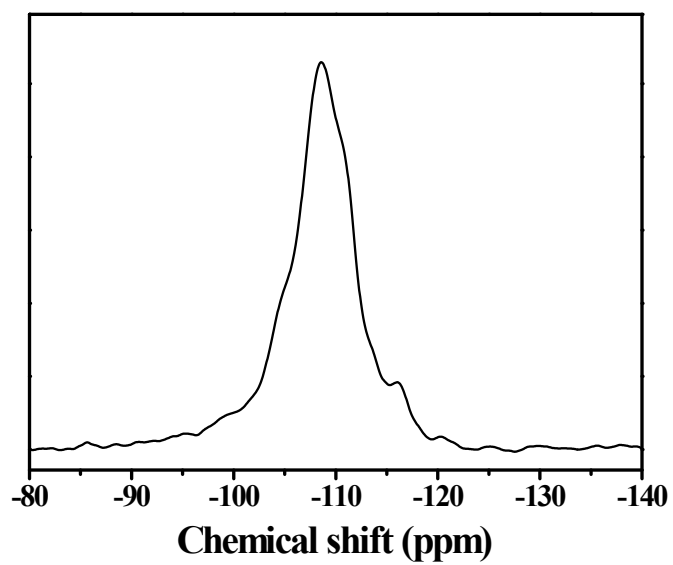

**Figure S9.**  $^{29}\text{Si}$  MAS NMR spectrum of S-Ti-Beta-100.

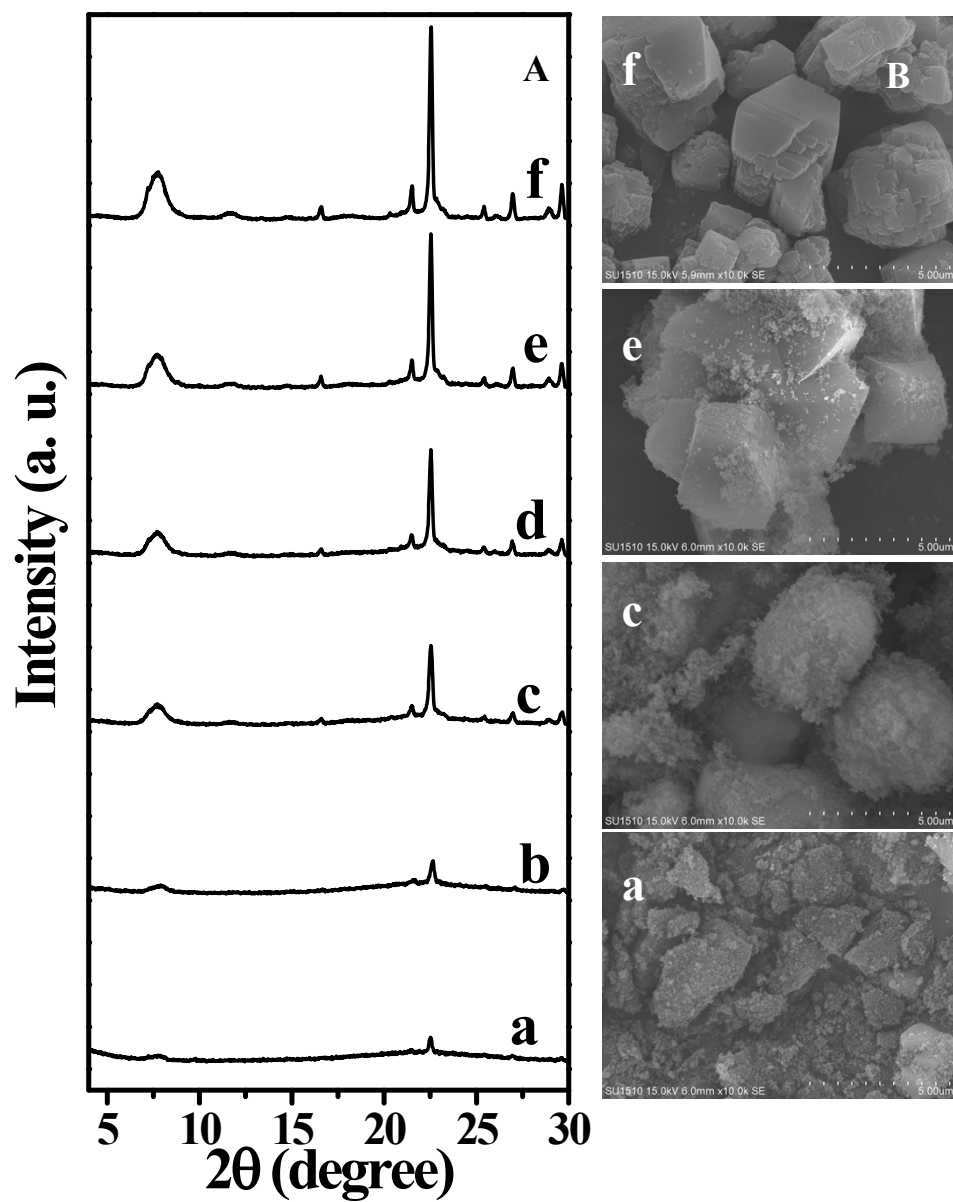

**Figure S10.** (A) XRD patterns, and (B) SEM images of S-Ti-Beta-100 samples crystallized at (a) 0, (b) 2, (c) 6, (d) 8, (e) 10, and (f) 12 days, respectively.
